# Supplementary material for: Expression of potato RNA-binding proteins StUBA2a/b and StUBA2c induces hypersensitive-like cell death and early leaf senescence in Arabidopsis
Source: PubMed Central journal article supplement (PMC4473998; doi:10.1093/jxb/erv207), 2015-05-05
Supplement: supp_erv207_jexbot143693_file001.pdf [file supp_erv207_jexbot143693_file001.pdf]

**Supplementary data for:**

**Expression of potato RNA binding proteins, *StUBA2a/b* and *StUBA2c*, induces early senescence in *Arabidopsis***

Jong-Kuk Na, Jae-Kwang Kim, Dool-Yi Kim, Sarah M. Assmann

**Supplementary Table S1.** List of primers used in this study.

| No | Primer ID        | Primer sequences (5' → 3')             | Comments                                   |
|----|------------------|----------------------------------------|--------------------------------------------|
| 1  | StUBA2a/b-F      | CCAAATCAGAAAACCCTAATTTCA               | Cloning to PCR <sup>™</sup> -Blunt II-TOPO |
| 2  | StUBA2a/b-R      | ACTTGGAAAGTAGAGCCATAGCATT              | Cloning to PCR <sup>™</sup> -Blunt II-TOPO |
| 3  | StUBA2c-F        | TCTTCTCTGAGCGAAAATGGA                  | Cloning to PCR <sup>™</sup> -Blunt II-TOPO |
| 4  | StUBA2c-R        | TCAGGAAATCACCACAACCA                   | Cloning to PCR <sup>™</sup> -Blunt II-TOPO |
| 5  | pGC1-F-SacII     | AAAACCGCGGATGGTTGCAACAGAGAGGATG        | Cloning to pORE-R2 vector                  |
| 6  | pGC1-R-XhoI      | AAAACTCGAGATTTCTTGAGTAGTGATTTTGAAG     | Cloning to pORE-R2 vector                  |
| 7  | smGFP-F-XhoI     | TTGTTCTCGAGTCTAGA ATGGCGAGTAAAGGAGAAGA | Cloning to pORE-R2 vector                  |
| 8  | smGFP-R-NotI     | AAAGCGGCCGCTTTTGTATAGTTCATCCATGC       | Cloning to pORE-R2 vector                  |
| 9  | StUBA2a/b-F-NotI | AAAGCGGCCGCATGGCGAAGAAGCGAAAAACC       | Cloning to pORE-R2 vector                  |
| 10 | StUBA2a/b-R-KpnI | AAAGGTACCACTTGAAGTAGAGCCATAGCATT       | Cloning to pORE-R2 vector                  |
| 11 | StUBA2c-F-NotI   | AAAGCGGCCGCATGGATCTAACAAAGAAACGC       | Cloning to pORE-R2 vector                  |
| 12 | StUBA2c-R-SpeI   | AAAACTAGTTCAGGAAATCACCACAACCAT         | Cloning to pORE-R2 vector                  |
| 13 | StACT-F          | TCCTCCATTGAAAAGAACTATG                 | RT-PCR analysis                            |
| 14 | StACT-R          | CCAGACACTGTACTTTCTCTC                  | RT-PCR analysis                            |
| 15 | StUBA2a/b-RT-F   | TGGAGGAAGGTAATGAAGAGGA                 | RT-PCR analysis                            |
| 16 | StUBA2a/b-RT-R   | GGCAAGAAGTCATCCTTGTACC                 | RT-PCR analysis                            |
| 17 | StUBA2c-RT-F     | TGAAACATTCACCAAAGACCAG                 | RT-PCR analysis                            |
| 18 | StUBA2c-RT-R     | TTGGGCACCTTTAAAGAAAGAA                 | RT-PCR analysis                            |
| 19 | SID2-F           | CAAATCTCAACCTCCGTCGT                   | RT-PCR analysis                            |
| 20 | SID2-R           | CAACAGCGATCTTGCCATTA                   | RT-PCR analysis                            |

|     |            |                                    |                 |
|-----|------------|------------------------------------|-----------------|
| 21  | PUB13-F    | TCTTGCAAAACGAAATGCAG               | RT-PCR analysis |
| 22  | PUB13-R    | TGTTTCTAGGCGAGCCAGTT               | RT-PCR analysis |
| 23* | NPR1-F     | TGCATCAGAAGCAACTTTGG               | RT-PCR analysis |
| 24* | NPR1-R     | CCGAGTTCCACGGTTTTAGA               | RT-PCR analysis |
| 25* | PAD4-F     | GCAAATTGCAACGGGAGTAT               | RT-PCR analysis |
| 26* | PAD4-R     | AGGGCCAGAATTGTTTCATTG              | RT-PCR analysis |
| 27* | AtTOR-F    | TCAGTCAGGCGAAATCTACTCTACT          | RT-PCR analysis |
| 28* | AtTOR-R    | TATCCTAGCAATGATTTGAGGTAGC          | RT-PCR analysis |
| 29* | AtATG18a-F | TCGCGTCGACTCCTTCAAATCATTCTTCCATG   | RT-PCR analysis |
| 30* | AtATG18a-R | TCGCTCTAGATTAGAAAAGTGAAGGCGGTTT    | RT-PCR analysis |
| 31* | AtATG9-F   | GTCGACATGAGCAGTGGGCATAAGGGTCCAAATG | RT-PCR analysis |
| 32* | AtATG9-R   | GGGCCCTCACCGTAATGTGGTGCTTGATGTTG   | RT-PCR analysis |
| 33* | AtATG8b-F  | AGATCTATGGAGAAGAACTCCTTCAAGC       | RT-PCR analysis |
| 34* | AtATG8b-R  | TCTAGATTAGCAGTAGAAAGATCCACCAAATGT  | RT-PCR analysis |
| 35* | AtATG8e-F  | AGATCTATGAATAAAGGAAGCATCTTT        | RT-PCR analysis |
| 36* | AtATG8e-R  | TCTAGATTAGATTGAAGAAGCAACGAA        | RT-PCR analysis |
| 37  | AtATG8f-F  | AGATCTATGGCAAAAAGCTCGTTCAAG        | RT-PCR analysis |
| 38  | AtATG8f-R  | TCTAGAAGCAAGAGGTCTCTATTATGGAGATCC  | RT-PCR analysis |
| 39  | AtATG8h-F  | AGATCTATGAAATCGTTCAAGGAACAATACAC   | RT-PCR analysis |
| 40  | AtATG8h-R  | TCTAGATCAACCAAAGGTTTTCTCACTGCT     | RT-PCR analysis |
| 41  | ORE1-F     | CAGCCGGTTACCTTCGTTA                | RT-PCR analysis |
| 42  | ORE1-R     | CCAAACGCAATCCAATTCTT               | RT-PCR analysis |
| 43  | EIN2-F     | CTTGGCTTCATCGTGCTACA               | RT-PCR analysis |
| 44  | EIN2-R     | ACCCAGAAATCCCAAAAAC                | RT-PCR analysis |
| 45  | AAO3-F     | GTGAGGCGTTTTTGTGAT                 | RT-PCR analysis |
| 46  | AAO3-R     | TCTTTGACCTGCACATCGAG               | RT-PCR analysis |
| 47  | EDS16-F    | ATGAGATTCAGCCTCGCTGT               | RT-PCR analysis |
| 48  | EDS16-R    | TGATGGATCTCCAATCGTCA               | RT-PCR analysis |
| 49  | SAG12-F    | GGATGTCCCGTTAATGATG                | RT-PCR analysis |

|      |                   |                                |                         |
|------|-------------------|--------------------------------|-------------------------|
| 50   | SAG12-R           | TCCACTTTCTCCCCATTTTG           | RT-PCR analysis         |
| 51   | LARP1a-F          | GCCGATGATCGAGAATTGAT           | RT-PCR analysis         |
| 52   | LARP1a-R          | GTTTTGAATGACGGCCAGAT           | RT-PCR analysis         |
| 53   | LARP1b-F          | ATGCAGGCTCGAGTGTCT             | RT-PCR analysis         |
| 54   | LARP1b-R          | TTTGGTTGCCATGCTCATAA           | RT-PCR analysis         |
| 55   | LARP1c-F          | TGCTTCTGTATCCGTTGCTG           | RT-PCR analysis         |
| 56   | LARP1c-R          | GCATTTGCAATCCCTGAGT            | RT-PCR analysis         |
| 57** | SAG13_F           | TGTAATGGCTACAAATCTCGAGTC       | RT-PCR analysis         |
| 58** | SAG13_R           | CTAGTCTGCCGTCAAATTGGTAAT       | RT-PCR analysis         |
| 59** | SAG14_F           | AGGACTACGATGTTGGTGATGATA       | RT-PCR analysis         |
| 60** | SAG14_R           | GAGTGTGACTCAAAAGAGAGCAAC       | RT-PCR analysis         |
| 61** | SIRK_F            | ATTTATCTTGAGCTGGGAAGAGAG       | RT-PCR analysis         |
| 62** | SIRK_R            | GGCATACATATTATTCAGCAACCA       | RT-PCR analysis         |
| 63** | WRKY6_F           | AACTGAGTCCAACAAAATTCAGAAG      | RT-PCR analysis         |
| 64** | WRKY6_R           | GTGGTTTCGTACCATTGATCATAGA      | RT-PCR analysis         |
| 65** | PR1_F             | ATCGTCTTTGTAGCTCTTGTAGGTG      | RT-PCR analysis         |
| 66** | PR1_R             | TGATACATCCTGCATATGATGCTC       | RT-PCR analysis         |
| 67** | PR2_F             | CTTACTTCAGCTACATGGGAGACA       | RT-PCR analysis         |
| 68** | PR2_R             | CAAGTTCCCAATTTTTAAATACGC       | RT-PCR analysis         |
| 69** | PR5_F             | ATGGCAAATATCTCCAGTATTCACA      | RT-PCR analysis         |
| 70** | EDR1_F            | AGATGAATACAAGCCAAAGTGTC        | RT-PCR analysis         |
| 71** | EDS1_R            | AGCGTAATCCACCACTTTCTAAAC       | RT-PCR analysis         |
| 72** | ACS6_F            | GTAATCGAGGAGATCGAAGATTGTA      | RT-PCR analysis         |
| 73** | ACS6_R            | TACTCTGCCAACACTTCTTCTTCTT      | RT-PCR analysis         |
| 74** | WR3_F             | ACTTCTCATATGCTCACTGATCCA       | RT-PCR analysis         |
| 75** | WR3_R             | GAAAGAAGAAGTGTGCAACAAGAC       | RT-PCR analysis         |
| 76   | StUBA2a/b-dRRM1-R | TTCTTCT GGTGTGCCGGATCTTTATCA   | StUBA2a/b RRM1 deletion |
| 77   | StUBA2a/b-dRRM1-F | GCACACC AGAAGAAGATTGGTACAAGGAT | StUBA2a/b RRM1 deletion |
| 78   | StUBA2a/b-dRRM2-R | TATGTGG CCTCTGTGTGACTCCGAAAC   | StUBA2a/b RRM2 deletion |

|    |                   |                                |                         |
|----|-------------------|--------------------------------|-------------------------|
| 79 | StUBA2a/b-dRRM2-F | ACAGAGG CCACATAAGACCTTTGAAGGG  | StUBA2a/b RRM2 deletion |
| 80 | StUBA2c-dRRM1-R   | TGGGCAC GCGGTTAGATACGTCGGCGT   | StUBA2c RRM1 deletion   |
| 81 | StUBA2c-dRRM1-F   | TAACCGC GTGCCCAACAAGATAATTGATG | StUBA2c RRM1 deletion   |
| 82 | StUBA2c-dRRM2-R   | GATCAAC CCTAAGCGCAACATCAGAAGA  | StUBA2c RRM2 deletion   |
| 83 | StUBA2c-dRRM2-F   | GCTTAGG GTTGATCCCGTGAAGACAGTA  | StUBA2c RRM2 deletion   |

\* These primers were previously used by Liu and Bassham (2010).

\*\* These primers were previously used by Kim et al (2008).

## Reference

**Liu Y, Bassham DC.** 2010. TOR is a negative regulator of autophagy in *Arabidopsis thaliana*. *PLoS one* 5: e11883

**Kim CY, Bove J, Assmann SM.** 2008. Overexpression of wound-responsive RNA-binding proteins induces leaf senescence and hypersensitive-like cell death. *New Phytologist* **180**, 57-70.

**Supplementary Table S2.** Identity and similarity among StUBA2s and other homologous proteins.

|                            | 1                 | 2                 | 3                 | 4                 | 5                 | 6                 | 7                 | 8                 | 9                 | 10                | 11                | 12                | 13                |
|----------------------------|-------------------|-------------------|-------------------|-------------------|-------------------|-------------------|-------------------|-------------------|-------------------|-------------------|-------------------|-------------------|-------------------|
| <b>1. AtUBA2b</b>          | <b><u>451</u></b> | 91%               | 67%               | 46%               | 53%               | 46%               | 42%               | 42%               | 24%               | 24%               | 24%               | 24%               | 24%               |
| <b>2. XP_002879905.1</b>   | 414               | <b><u>447</u></b> | 66%               | 45%               | 53%               | 46%               | 40%               | 42%               | 24%               | 25%               | 24%               | 24%               | 25%               |
| <b>3. AtUBA2a</b>          | 325               | 321               | <b><u>478</u></b> | 47%               | 54%               | 47%               | 42%               | 43%               | 23%               | 24%               | 22%               | 24%               | 23%               |
| <b>4. VfAKIP1</b>          | 250               | 242               | 259               | <b><u>515</u></b> | 57%               | 45%               | 40%               | 43%               | 23%               | 25%               | 23%               | 22%               | 23%               |
| <b>5. XP_002307930.1</b>   | 263               | 260               | 271               | 307               | <b><u>474</u></b> | 50%               | 47%               | 46%               | 25%               | 25%               | 23%               | 24%               | 24%               |
| <b>6. XP_003632233.1</b>   | 232               | 235               | 243               | 248               | 255               | <b><u>478</u></b> | 64%               | 58%               | 24%               | 23%               | 23%               | 23%               | 25%               |
| <b>7. XP_003519490.1</b>   | 218               | 213               | 222               | 224               | 248               | 329               | <b><u>496</u></b> | 55%               | 24%               | 23%               | 21%               | 22%               | 23%               |
| <b>8. <u>StUBA2a/b</u></b> | 221               | 221               | 228               | 242               | 244               | 296               | 283               | <b><u>492</u></b> | 24%               | 23%               | 21%               | 23%               | 23%               |
| <b>9. AtUBA2c</b>          | 121               | 123               | 121               | 125               | 131               | 128               | 132               | 130               | <b><u>404</u></b> | 60%               | 46%               | 45%               | 42%               |
| <b>10. XP_002285377.1</b>  | 131               | 130               | 132               | 139               | 138               | 131               | 133               | 132               | 275               | <b><u>449</u></b> | 43%               | 45%               | 39%               |
| <b>11. XP_002305079.1</b>  | 119               | 120               | 115               | 125               | 122               | 121               | 117               | 113               | 191               | 198               | <b><u>384</u></b> | 45%               | 44%               |
| <b>12. <u>StUBA2c</u></b>  | 124               | 122               | 126               | 123               | 127               | 123               | 122               | 124               | 199               | 212               | 196               | <b><u>424</u></b> | 52%               |
| <b>13. XP_003520185.1</b>  | 120               | 122               | 118               | 123               | 121               | 128               | 124               | 123               | 180               | 184               | 184               | 226               | <b><u>384</u></b> |

\* Bold numbers with underline denote amino acid length of the corresponding protein.

Top lines with percentage denote aligned sequence identity and bottom lines indicate identical sequence length.

**Supplementary Table S3.** Characteristics of genes used for expression assays.

| <b>Locus ID</b> | <b>Gene/protein</b> | <b>Full name</b>                             | <b>Senescence type</b>      | <b>Defense (cell death)</b> | <b>Pathway</b>                     | <b>Regulation by StUBA2a/b</b> |
|-----------------|---------------------|----------------------------------------------|-----------------------------|-----------------------------|------------------------------------|--------------------------------|
| At4g35890       | LARP1c              | La Related protein 1c                        | Age-dependent senescence    | N/A                         | Senescence                         | no effect                      |
| At5g45890       | SAG12               | Senescence-Associated gene 12                | Age-dependent senescence    | N/A                         | Senescence                         | no effect                      |
| At2g29350       | SAG13               | Senescence-Associated gene 13                | Age-dependent senescence    | N/A                         | Senescence                         | upregulated                    |
| At1g62300       | WRKY6               | WRKY transcription factor 6                  | Age-dependent senescence    | Plant defense               | Senescence/Pathogen defense        | slightly upregulated           |
| At5g66100       | LARP1b              | La Related protein 1b                        | Age-dependent senescence    | N/A                         | Senescence                         | no effect                      |
| At5g39610       | ORE1                | Oresara 1                                    | Age-dependent senescence    | N/A                         | Senescence                         | upregulated                    |
| At2g27150       | AAO3                | Abscisic aldehyde oxidase 3                  | Age-dependent senescence    | N/A                         | ABA biosynthesis                   | slightly upregulated           |
| At5g03280       | EIN2                | Ethylene insensitive 2                       | Age-dependent senescence    | N/A                         | Ethylene signaling/stress response | no effect                      |
| At1g50030       | AtTOR               | Target of rapamycin                          | Accelerated senescence      | N/A                         | Autophagy                          | no effect                      |
| At4g04620       | AtATG8b             | Autophagy 8B                                 | Accelerated senescence      | N/A                         | Autophagy                          | upregulated                    |
| At2g45170       | AtATG8e             | Autophagy 8E                                 | Accelerated senescence      | N/A                         | Autophagy                          | upregulated                    |
| At4g16520       | AtATG8f             | Autophagy 8F                                 | Accelerated senescence      | N/A                         | Autophagy                          | no effect                      |
| At3g15580       | AtATG8h             | Autophagy 8H                                 | Accelerated senescence      | N/A                         | Autophagy                          | slightly upregulated           |
| At3g62770       | AtATG18a            | Autophagy 18A                                | Accelerated senescence      | N/A                         | Autophagy/stress response          | no effect                      |
| At2g31260       | AtATG9              | Autophagy 9                                  | Accelerated senescence      | Plant defense               | Autophagy                          | slightly upregulated           |
| At4g11280       | ACS6                | 1-aminocyclopropane-1-carboxylate synthase 6 | Ethylene-induced senescence | N/A                         | Ethylene biosynthesis              | upregulated                    |

|           |            |                                         |                             |                           |                              |                      |
|-----------|------------|-----------------------------------------|-----------------------------|---------------------------|------------------------------|----------------------|
| At2g19190 | SIRK       | Senescence-induced receptor-like kinase | Leaf senescence             | N/A                       | Senescence                   | upregulated          |
| At5g50200 | WR3        | Wound-Responsive 3                      | Leaf senescence             | Plant defense             | Wounding response            | upregulated          |
| At3g48090 | EDS1       | Enhanced disease susceptibility 1       | N/A                         | SA-mediated plant defense | SA signaling/Stress response | no effect            |
| At2g14610 | PR1        | pathogenesis-related protein 1          | N/A                         | Plant defense             | Systemic acquired resistance | upregulated          |
| At3g57260 | PR2        | pathogenesis-related protein 2          | N/A                         | Plant defense             | Systemic acquired resistance | upregulated          |
| At5g20230 | SAG14      | Senescence-Associated gene 14           | N/A                         | N/A                       | N/A                          | slightly upregulated |
| At5g21160 | LARP1a     | La Related protein 1a                   | N/A                         | N/A                       | N/A                          | no effect            |
| At1g74710 | SID2/EDS16 | Salicylic acid induction deficient 2    | N/A                         | SA-mediated plant defense | SA signaling/SA biosynthesis | slightly upregulated |
| At1g64280 | NPR1       | Nonexpressor of PR genes 1              | SA-mediated leaf senescence | SA-mediated plant defense | SA signaling                 | upregulated          |
| At3g52430 | PAD4       | Phytoalexin deficient 4                 | SA-mediated leaf senescence | Plant defense             | SA signaling/SA accumulation | upregulated          |
| At3g46510 | PUB13      | Plant U-Box 13                          | SA-mediated leaf senescence | SA-mediated plant defense | SA signaling                 | no effect            |





```

          320          *          340          *          360          *
StUBA2a/b : LDKQNGKPKGFCLFVYKTVEGARKALEEPHKTFEGHTLHCOKAIDGPKHSKNFHQQQQPQSQ : 351
XP_003519490 : LDKNTGKPKGFALFVYKSVESAKKALEEPNKNYEGHTLYCOKAVDGPKGSKGYHHQQHSHS- : 360
XP_003632233 : LDKSTGKPKGFALFVYKSIESRRALEEPHKTFEGHTLHCOKAIDGPKPNKPPH----- : 339
AtUBA2b : LDKATGRPKGFALFVYRSLESAKKALEEPHKTFEGHVLHCHKANDGPKQVKQHQHNNH---- : 317
XP_002879905 : LDKVTGRPKGFALFVYRSLESAKKALEEPHKTFEGHVLHCHKANDGPKQVKQHQHNNH---- : 312
AtUBA2a : LDKYTGRPKGFCLFVYKSSSESAKRALEEPHKTFEGHILHCOKAIDGPKPKGKQQQHNNH---- : 335
VfAKIP1 : LDKATGKPKGFCLFVYKSAESARRSLEEPHKTFEGHILHCORAIIDGPKAGKTQHPQPQLQH : 345
XP_002307930 : LDKATGKPKGFCLFVYKTVESAKKALEEPHKTFEGHILHCOKAVDGPKHAKSQQKPPQQ---- : 327

```

```

          380          *          400          *          420          *
StUBA2a/b : QH-----YPQHSHHNQQQHYQHHPAKKGYSGSSAGSAGHGLMAPSGPAPVGYNP---AV : 404
XP_003519490 : -----HHHHHHHQPHYQKKEKNKYSGGGGPSHGSGLHMAPSGSAVGGFNPG-VP : 410
XP_003632233 : -----HHHHQHQPHYPSRKDKSKYSANAAG---PGLHMAPSGSPMTLNPNG---VA : 383
AtUBA2b : -----SHNQNS-RYQRNDNNGYGAPG-----GHGHEIAGNNQ-----AV : 350
XP_002879905 : -----SHNQNS-RYQRNDNNGYGAPG-----GHGHEIAGNNQ-----AA : 345
AtUBA2a : -----PHAYNNPRYQRNDNNGYGPPG-----GHGHEIAGNNQ-----PTA : 374
VfAKIP1 : VNLSLQFNQLNQLNPATQRTQQRNDNVGYVGGSSVAVSQPGLHMAPAGPTIGYNQAAASAA : 407
XP_002307930 : -----HNNMQSSHYQRNDGGGYVASG-----GRGGLHMAPAAAGAGIGFNQSA : 372

```

```

          440          *          460          *          480          *
StUBA2a/b : AAVT----PALGQALTALLATQAGLIGLNLGGLG-----GPNVHQVQPVVNNAT : 452
XP_003519490 : QGLN----PVLGQALTALIN-QGAGLGLGNLGLGLG-----APVNQGGPPAPYANQP : 458
XP_003632233 : PALN----PALGQALTALLASQAGLGLTNLGLGLG-----APVNQAMPAAAHGMOG : 432
AtUBA2b : QAFN----PAIGQALTALLASQAGLGLNQAFQALLGTLGTAS---PGAVGMPSSYGTQA : 405
XP_002879905 : QAFN----PAIGQALTALLASQAGLGLNQAFQALLGTLGTAS---PGAVGMPSSYGTQA : 400
AtUBA2a : QVIN----PAIGQALTALLASQAGLAFNPATQALLGSLGTAAGVNPNGVGMPTGYGTQA : 432
VfAKIP1 : QGLNPVLTALGQALTALLASQATLGLSDLLGSLGTSNALNHGGVPAAGHGVQSGYSAQP : 468
XP_002307930 : PALN----PALGQALTALLATQAGLGLTNLGLTLGSAAAVTQGGVPSAAHGMQGAYGNOA : 430

```

```

          500          *          520          *          540          *
StUBA2a/b : GYG-----AQGGYCAQPHMYYQNPQMGGARPQ-----GGGAPYSYGGH : 492
XP_003519490 : AMG-----YGNOPAMQPGYQNPQMGGSSGVRPHP-----GAGAPYMGH--- : 496
XP_003632233 : MQGGYGNQAGSYGSQPGMQGGYQNPQMGGASGGRPQ-----QGGAPYMGH--- : 478
AtUBA2b : NITSPGVYPGYGA---QAGYQGGYQTPQPGGGAGRGQH---GAG-YGGPYMGR--- : 451
XP_002879905 : NITPGVYPGYAA---QAGFQGGYQTPQPGGGSAGRGQH---GVG-YGGPYMGQM-- : 447
AtUBA2a : -MAPGTPGYGT---QPGLOGGYQTPQPGGGTSRGRQH---GVPYGTPTYMGH--- : 478
VfAKIP1 : TITSPVMGAYGNSVPQVGLQVQVQPNQIQGGGSRGQYGA-----ASYMGH--- : 515
XP_002307930 : SITSPGVIGAYAN---QGAMQGGYQNPQMGGGSRGQHGGY-----TPYMGH--- : 474

```

**B.**

```

AtUBA2c      : M*MMKKRKL20ENGLNLTNGGG-----TIGP40TRLS*PDARKI60IERFTT*DQLD*LLQEAIV : 55
XP_002285377 : M*DA*TKR*KMDENGLVSTDGDS-----LTKL40APEDARKI60IEPF*GH*DQLLEILQNAAV : 51
StUBA2c     : MDLTKR*KKADENGGAYPVSN-----ELVT40TAAAPPALAVL60SE*EDIDKILE*FTFK*QCVSILRNAAL : 61
XP_003520185 : M*EFPK*RKKTQENGDTTDSPPPQSTEEAPLAAATPAPAS40PLASE60DIRKILQPF*SQEQ*LLD*LLQSASL : 67
XP_002305079 : M*E*FIK*RKKA*ENGLISPTGTSP-----PSP40I*TPL*TE*EIRKILE60PF*TK*DQLD*LILQ*SATL : 55

AtUBA2c      : R*HPD80VLES*VRLTADSD100TS*QRKLF120FIRGLAAD140TTTE*GLRSLFSS160YGDLEEAIVILDK180VT*GKSKGYGFVT : 122
XP_002285377 : R*HD80VLD*AI*RSI100ADRDL120TQRKLF140FIRGLGWD160TTTE*GLRQLFSA180YGELEEAIVILDK200VT*AKSKGYGFVT : 118
StUBA2c     : R*YAD80VLEGLRAVAD100AD120SNRKL140FVRGLGW160ETTT*DKLRQ180VFS200SE*FGELDEAVVITDK220ASSR*SKGYGFVT : 128
XP_003520185 : R*HPD80VLD*AVRAVAD100CD120SLRKL140FVRGLAGE160ETTT*ELRSV180FS200SE*FGELDEAIVIMDKAT220CR*SKGYGFV : 134
XP_002305079 : H*SD80ILNS*VRSVAD100GD120ISLRKLF140FIRGLS160SETT*SDTL180RILFSS200FGEL*EEAIVIH220DKNT*GKSKGFGFIT : 122

AtUBA2c      : F*MH140VDGALL160LALKE180PSK200KIDGRVTVTQLAAS220CN*QGTGS--QIAD240ISMRKI260YVANVP280ED*MPADRLLNHF : 187
XP_002285377 : F*KH140VDGALL160LALKE180PSK200KIDGRMTVTQLAAS220SL*SGPASNASAV240DVSMRKI260YVANVP280VD*MPADRLLAHF : 185
StUBA2c     : F*KH140VDAA160AIL180SLKVP200NK220ITIDGRVTVTQLA240AA*CNS260CNSQ---SS280DVALR300KI320YVGNVP340FE*ISSEKLLNHF : 192
XP_003520185 : F*RH140VDGAIL160LAKDP180SK200KIDGRMTVTQLA220AG*PGGG---D240VS260LRK280V300FVGNVP320FE*ISSERLLDEF : 195
XP_002305079 : F*KH140VD160SAM180L200SIRE220PSK240KIDGRITVTQLAS260NN*S-----S280TG300DV320SLR340KV360YVGNVP380FE*IT400SERLLG420GF : 182

AtUBA2c      : M*AY220GDVEEGPLGFDK240VTGK260SRGFAL280FVYK300TAECAQ320AALADP340VK360VIDGKHLN380C400KLAV420DGK440KGK---- : 250
XP_002285377 : S*SY220GEIEEGPLGFDK240QTGK260SRGFAL280FVYK300TAEAAQ320AALVDP340TK360MIDGRQL380V400CKLAL420EGK440KGKT---- : 248
StUBA2c     : S*MY220GEIEEGPLGFDK240QTGK260AKGFAL280FVYK300TE320DGARAS340LVDP360VK380VEGH400QV420CKLAV440DNKK460GK480PQNMG : 259
XP_003520185 : L*K220FEVEEGPLGFDK240SS260GK280SRGFAL300FVYK320TE340EGARAS360LV380PE400LK420TEGH440QV460CKLAV480DNKK500TKP---- : 258
XP_002305079 : S*MY220GEIEEGPLGFDK240STGK260SKGFAL280IYK300SE320DGAK340AALADP360M380KNIDG400H420QV440CKLAV460DN480KRVN500TS-- : 247

AtUBA2c      : -*P280GM300PQAQD---G320SGH340GHVH360GEGM380GMVR400PAGP---Y420GAAG440CI460SAY480GGYS----- : 293
XP_002285377 : -*G280PA300QAPT320GV340PGEAG360HGDGL380VPP400QGS420MPG440SLGS460QYP480GGPG500CI520SAY540GGFS----- : 298
StUBA2c     : H*G280AP300GMNAG320PG340MPG360DD380RVGS400MP420GS440SNY460GV480PV500SGL520GP540YS560GF580SG600PG620PM640QPP660Q680PM700VAH720Q740N760PH780LN : 326
XP_003520185 : -----F280G300TD320QH340QHQ360QH380FP400QQ420MQ440QV460S480MM500VP520P540Q560Y580GG600Y620GN640Y660GM680Q700Q----- : 298
XP_002305079 : -----Q280G300ANA320QNS340Q360PL380AH400PS420F440P460Q480P500Q520NS540IG560GV580T600GS620L640Q660NY680GS700ASN----- : 288

AtUBA2c      : ---340GG360PP---A380H400HM420NS440TH460SS480MG500VG-----S540AG560Y580GG600H : 318
XP_002285377 : ---340GG360PP380PL400GHH420H440PL460NS480SL500PS520SL540GG560GP580L600SS620Q640VP660SS680L700GG720S740AG760Y780G800AG820LG840GP860Y880G900PN920S940AG960YS980GL : 362
StUBA2c     : SA340IG360GP380G-----Y420GN440Q460GP480GS500F : 342
XP_003520185 : QQ340H360Q380V400PP-----Y420NN440Q460V480P500V520AG : 314
XP_002305079 : -----S340Y360QL380NT400SL420TS : 298

AtUBA2c      : Y420GG440Y460GG480PG500GT520GV540Y560G580LG600GG620Y640GP660CT680GS700G720Y740RM760PP780SS800MP820G840-GG860Y880PES900CH920Y940CL960SS980S1000AG1020Y1040PG1060QH1080AVG : 384
XP_002285377 : GG420AG440CL460GG480AA500GA520LG540V560AG580GA600LV620AG640GG660SS680SL700Y720RL740PP760ST780VG800MP820SG840Y860PD880SG900HY920SL940SS960S980AY1000PS1020Q1040I1060H1080OPAG : 429
StUBA2c     : TG420G440AG460GY480AG500AG520GG540Y560GS580CD600YS620GY640RM660P680QS700S720AG740MP760SS780GG800Y820PD840GN860Y880CL900Q-----SS920Y940PS960Q980VP1000Q : 404
XP_003520185 : GG420Y440GH460RY480GN500S520Q540M560AG580P-----V600S620CD640Y660GA680R700V720PP740NS-----GG760Y780PD800GS820Y840GF860-----P880SS900-G920H940PP960Q : 364
XP_002305079 : S420Y440NG460AY480RV500PP520Y540V560G580AG600PND620GL640LN660AG680AS700MY720RM740P760Q780ST800V820GT840GS860Y880Y900PD920AG940SV960AL980SQ-----Q1000Q1020H1040Q1060PS1080 : 361

AtUBA2c      : T480SP500V520PR540VP560H--G580MY600P620NG640PP660NY- : 404
XP_002285377 : T480SP500V520PR540VP560--G580MY600P620SG640PP660YY- : 449
StUBA2c     : P480G500AG520SR540VP560--G580MY600Q620GM640PP660YY- : 424
XP_003520185 : P480R500V520PM540AR560PP--G580MY600Q620G640AP660PPY- : 384
XP_002305079 : M480PL500PP520RR540FP560HG580AG600MY620Q640GM660PP680PPY : 384

```

**Supplementary Figure S1.** Alignment of full-length potato StUBA2s with homologous proteins in several plant species. **A.** StUBA2a/b and its homologous proteins. **B.** StUBA2c and its homologous proteins.

**A**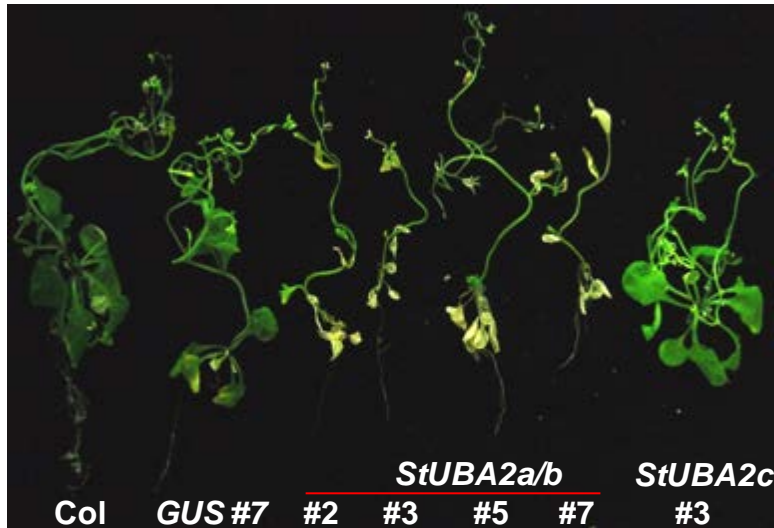**B**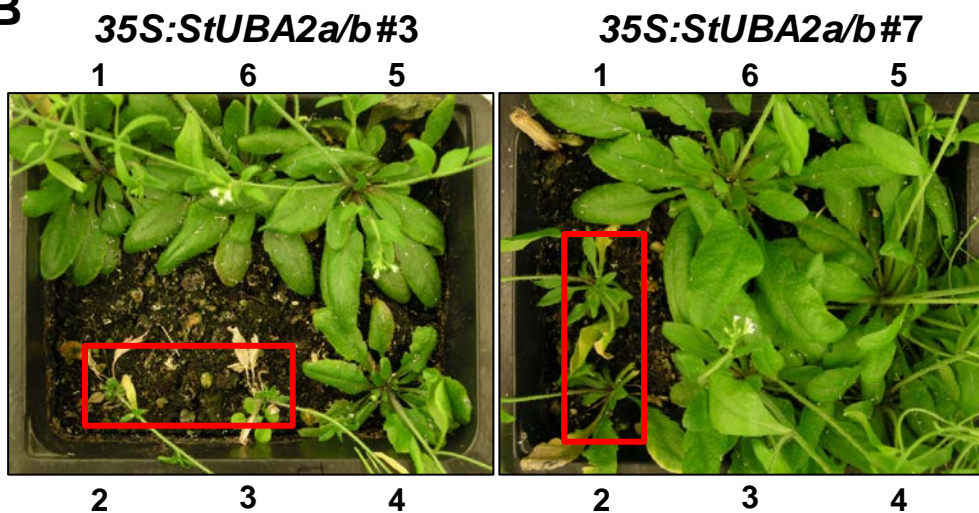

**Supplementary Figure S2.** Early leaf senescence of *35S:StUBA2a/b* plants grown aseptically in magenta boxes, or in soil. **A.** Senescing phenotype observed in six-week-old T3 *35S:StUBA2a/b* plants in MS media. # numbers refer independent transgenic lines. Each T3 transgenic line was germinated in MS plate containing kanamycin and then kanamycin-resistant plants were transferred to antibiotic-free MS media. **B.** Senescing phenotype observed only in two-month-old T2 transgenic plants grown in soil at growth chamber. These plants are the same as those shown in Fig. 3A, but at a later developmental stage. Numbers indicate individual T2 plants from either *35S:StUBA2a/b* #3 or *35S:StUBA2a/b* #7.

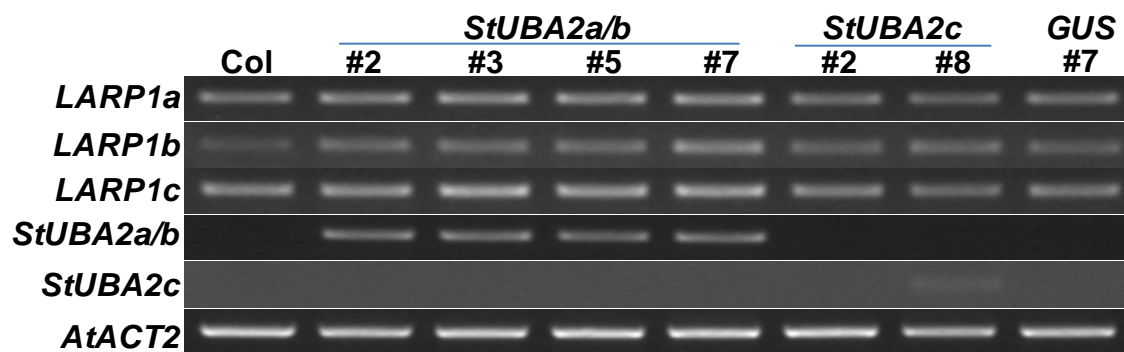

**Supplementary Figure S3.** Transcript levels of *LARP1* RBP family are not altered by the overexpression of *StUBA2a/b*.

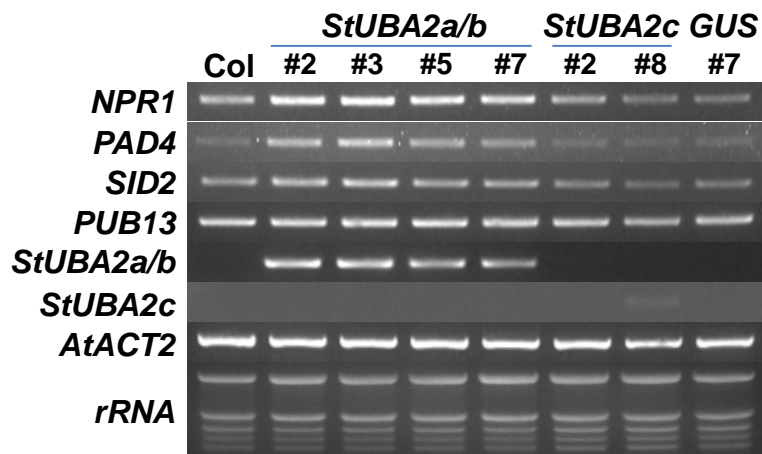

**Supplementary Figure S4.** Elevated transcript levels of genes involved in SA signaling or biosynthesis in T3 *35S:StUBA2a/b* plants. RT-PCR was carried out using gene specific primers (Supplementary Table S1). Among *StUBA2a/b* transgenic lines, #2, #3, and #7 lines were heterozygous, and #5 was homozygous. *StUBA2c* #2 and #8 and *GUS* #7 lines were homozygous. *GUS* #7 line was used as vector control.

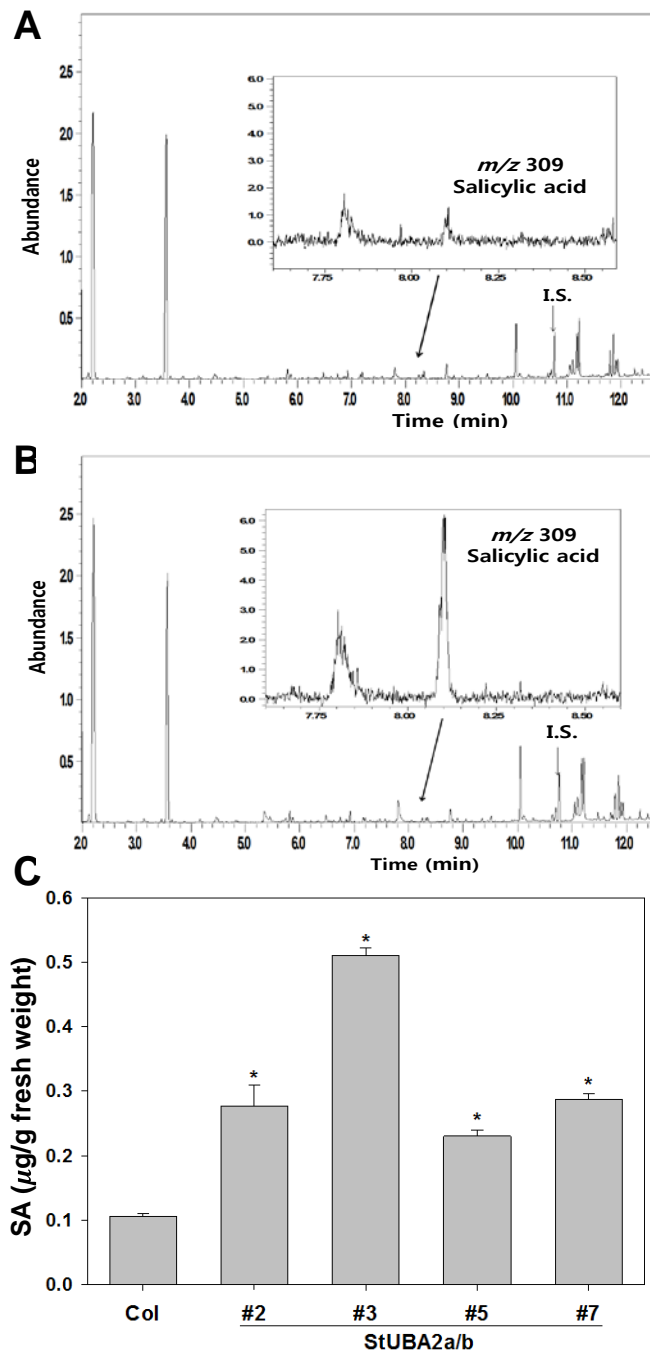

**Supplementary Figure S5.** SA content in three-week-old *35S:StUBA2a/b* and wild type plants grown in MS media under  $120 \mu\text{mol}^{-1} \text{m}^{-2}$  light with 16/8 light/dark conditions. Representative total ion chromatogram of SA extracted from Col (**A**) and *StUBA2a/b* #3 (**B**) as TBDMS derivatives separated on a  $30 \text{ m} \times 0.25 \text{ mm}$  i.d. fused-silica capillary column coated with  $0.25\text{-}\mu\text{m}$  CP-SIL 8 CB low bleed. The upper trace was recorded in SIM mode (*m/z* 309, quantification ion of SA). Internal Standard (I.S.) 3,4,5-trimethoxycinnamic acid. **C.** SA contents in the given genotypes. Asterisk indicates a significant difference at  $P < 0.05$ .

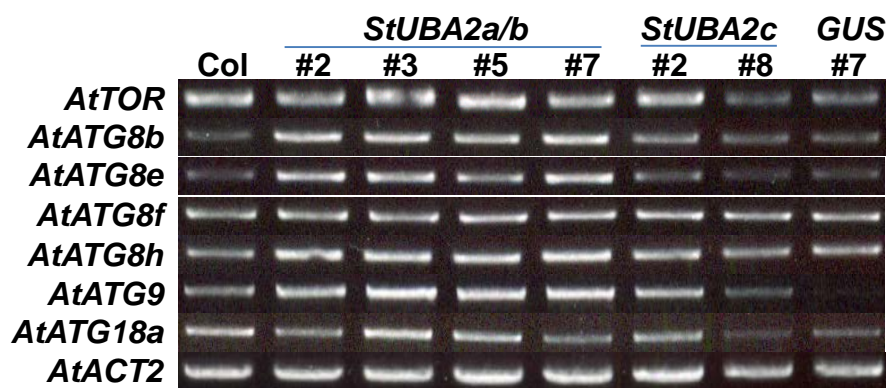

**Supplementary Figure S6.** Altered expression of autophagy-associated genes in *35S:StUBA2a/b* transgenic plants. RT-PCR was carried out using autophagy-associated gene specific primers (Supplementary Table S1).

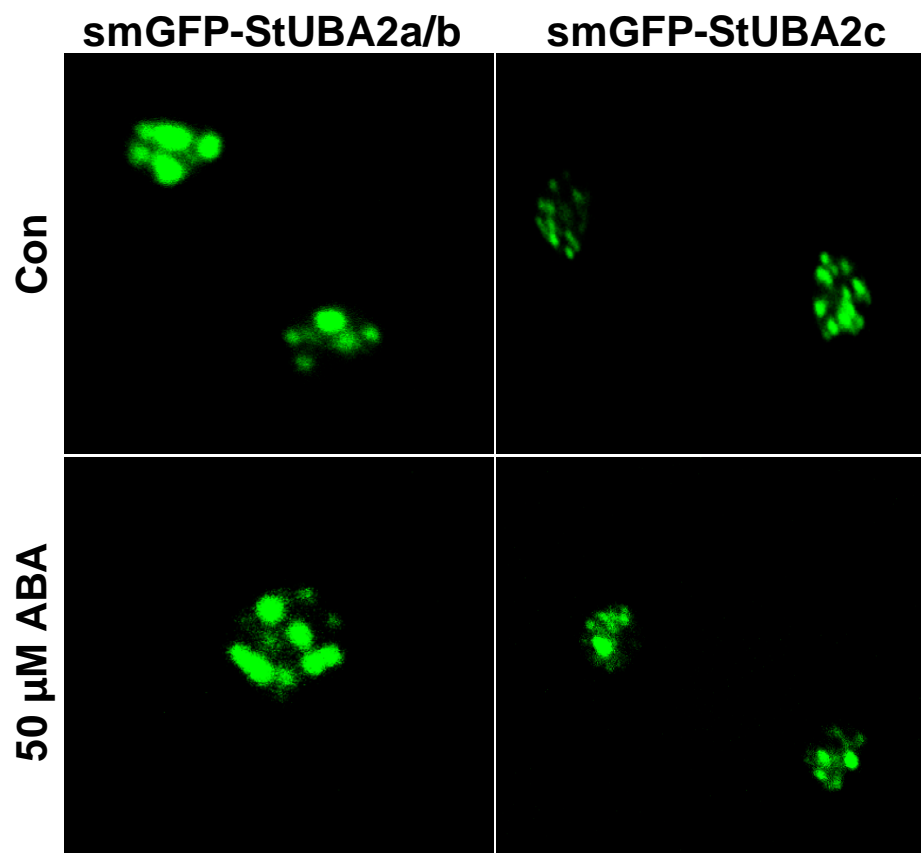

**Supplementary Figure S7.** smGFP-StUBA2s did not relocalize with exogenous ABA application.



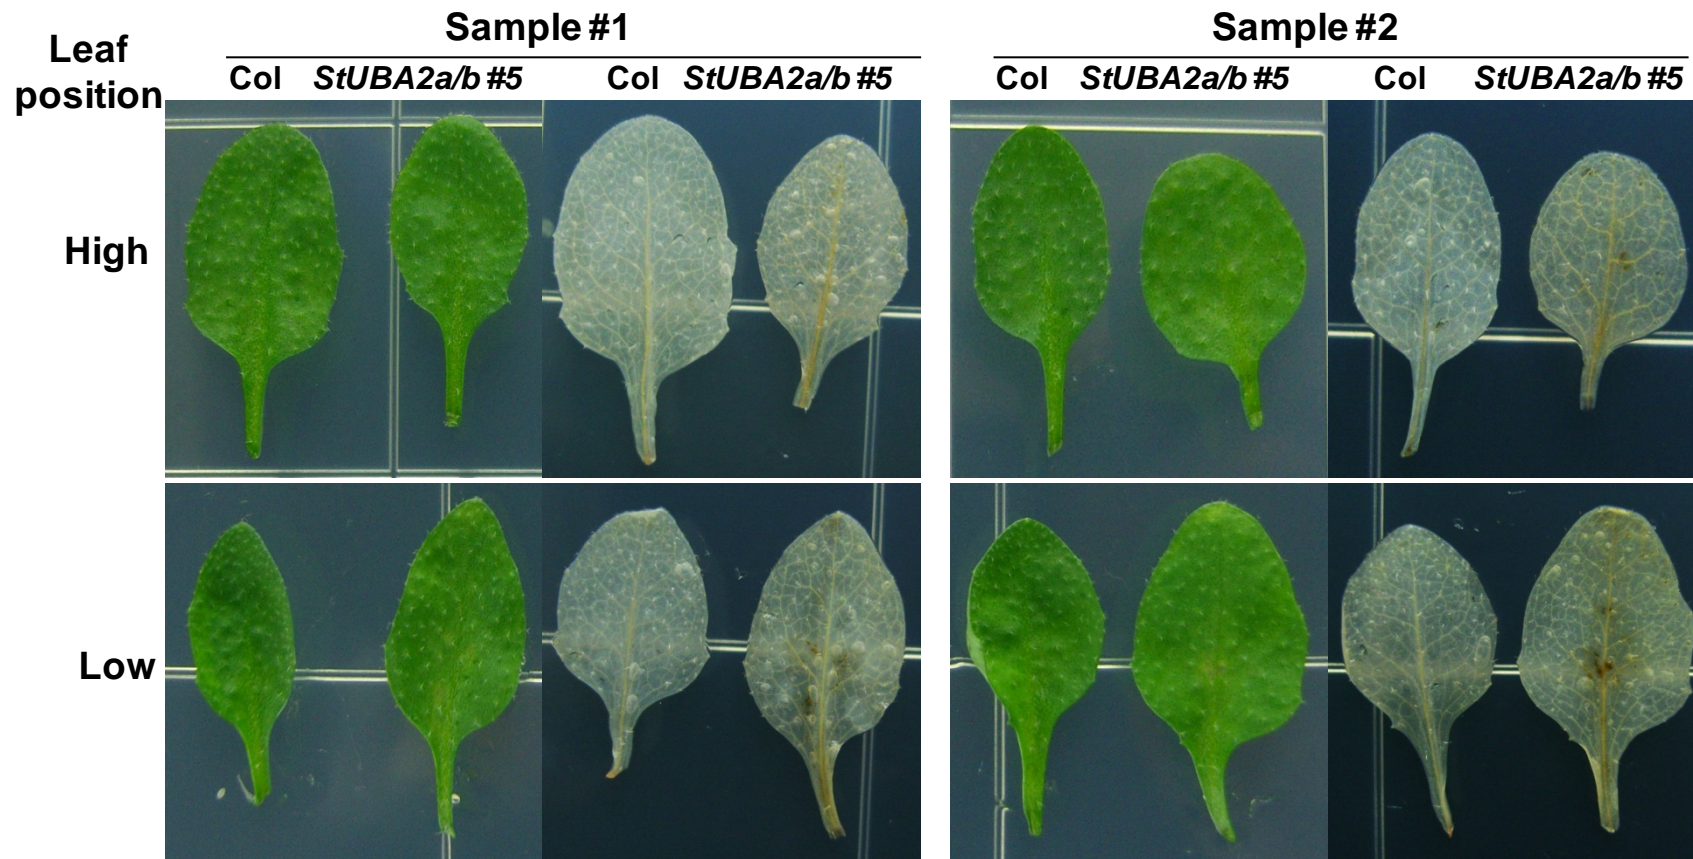

**Supplementary Figure S8.** H<sub>2</sub>O<sub>2</sub> accumulation in the young or old leaves of *35S:StUBA2a/b* transgenic plants.

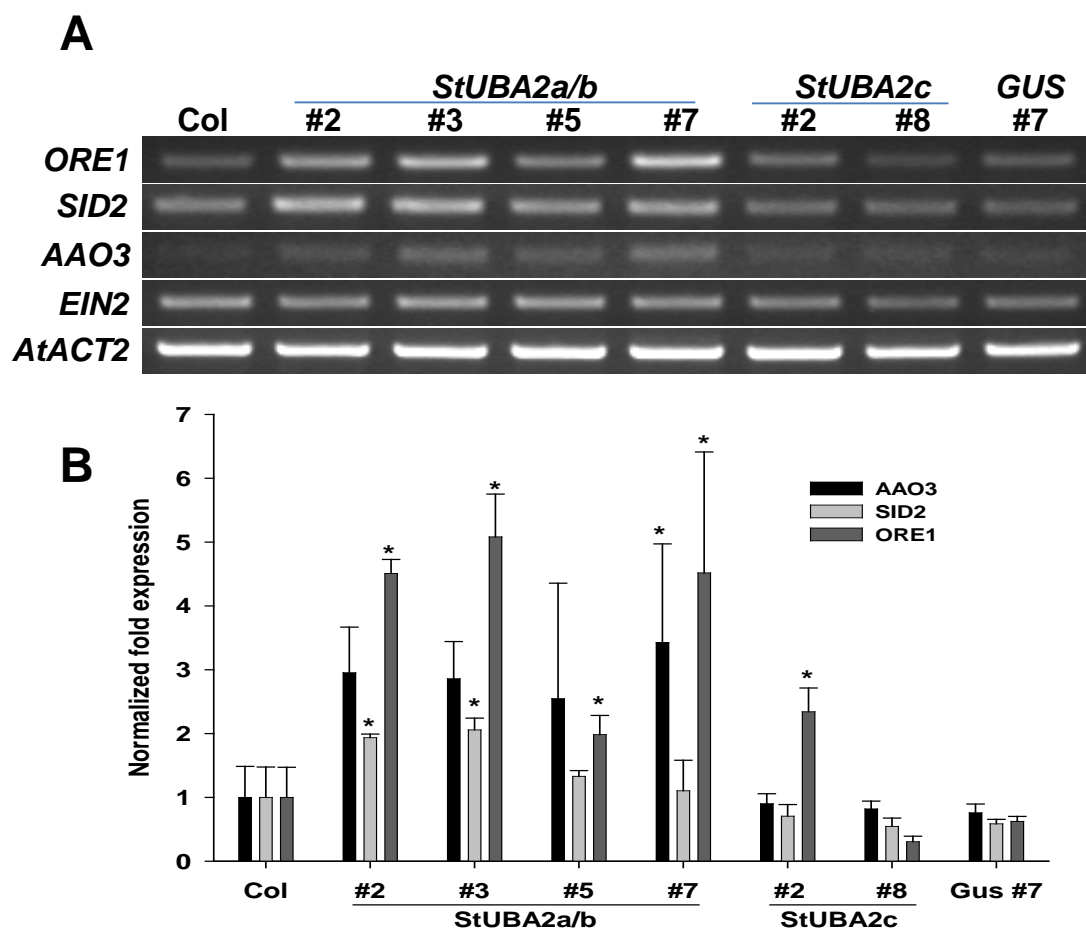

**Supplementary Figure S9.** Age-dependent leaf senescence marker gene *ORE1* is upregulated by the overexpression of *StUBA2a/b*. # numbers refer to independent T3 lines. **A.** RT-PCR analysis of *ORE1*, *SID2*, *AAO3*, and *EIN2* genes. **B.** qRT-PCR analysis of *AAO3*, *SID2*, and *ORE1* gene. Transcript level of *Actin2* gene was used as reference. Asterisk indicates a significant difference at  $P < 0.05$ .
